# Supplementary material for: Effectiveness of the WHO-Authorized COVID-19 Vaccines: A Rapid Review of Global Reports till 30 June 2021
Source: MDPI journal article supplement (doi:10.3390/vaccines9121489), 2021-12-16
Supplement: s1 [file s1]

## Supplementary Figure

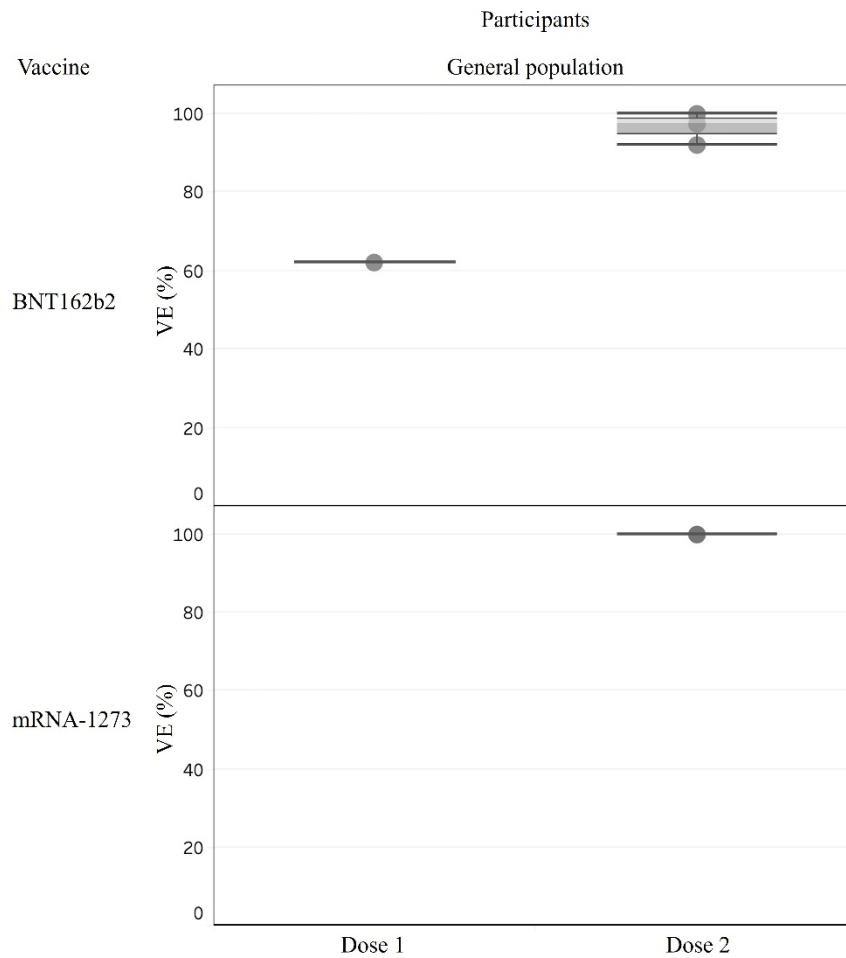

Figure S1. Vaccine effectiveness against critical disease

## Supplementary Tables

Table S1. Characteristics of the included studies (n=39)

|                                                     |  |    |
|-----------------------------------------------------|--|----|
| Country of origin                                   |  |    |
| The United Kingdom                                  |  | 12 |
| The United States                                   |  | 7  |
| Israel                                              |  | 7  |
| Italy                                               |  | 3  |
| Denmark                                             |  | 2  |
| Canada                                              |  | 2  |
| Brazil                                              |  | 2  |
| Qatar                                               |  | 1  |
| Sweden                                              |  | 1  |
| Spain                                               |  | 1  |
| Finland                                             |  | 1  |
| Study design                                        |  |    |
| Cohort                                              |  | 30 |
| Case control                                        |  | 9  |
| Vaccine                                             |  |    |
| BNT162b2                                            |  | 36 |
| mRNA-1273                                           |  | 12 |
| ChAdOx1                                             |  | 10 |
| CoronaVac                                           |  | 2  |
| Ad26.COV2.S                                         |  | 1  |
| Study participants                                  |  |    |
| General population                                  |  | 22 |
| Healthcare workers                                  |  | 17 |
| Residents of long-term care facility                |  | 4  |
| Individuals with comorbidities or chronic illnesses |  | 2  |
| Outcomes of interest                                |  |    |
| Infection                                           |  | 29 |
| Asymptomatic infection                              |  | 5  |
| Symptomatic infection                               |  | 13 |
| Hospitalization                                     |  | 11 |
| Severe illness                                      |  | 4  |
| Death                                               |  | 9  |
| SARS-CoV-2 variants of concern included             |  |    |
| B.1.1.7                                             |  | 16 |
| B.1.351                                             |  | 2  |
| P.1                                                 |  | 4  |
| B.1.617.2                                           |  | 1  |

Table S2. Risk of bias assessment by ROBINS-I

|                                      | Bias due to confounding | Bias in selection of participants into the study | Bias in classification of interventions | Bias due to deviations from intended interventions | Bias due to missing data | Bias in measurement of outcomes | Bias in selection of the reported result | Overall bias |
|--------------------------------------|-------------------------|--------------------------------------------------|-----------------------------------------|----------------------------------------------------|--------------------------|---------------------------------|------------------------------------------|--------------|
| Dagan et al. <sup>27</sup>           | Moderate                | Low                                              | Low                                     | Low                                                | Low                      | Low                             | Low                                      | Moderate     |
| Haas et al. <sup>32</sup>            | Moderate                | Low                                              | Low                                     | Low                                                | Low                      | Low                             | Low                                      | Moderate     |
| Pritchard et al. <sup>41</sup>       | Moderate                | Low                                              | Low                                     | Low                                                | Low                      | Low                             | Low                                      | Moderate     |
| Pawlowski et al. <sup>39</sup>       | Moderate                | Low                                              | Low                                     | Low                                                | Low                      | Low                             | Low                                      | Moderate     |
| Björk et al. <sup>22</sup>           | Serious                 | Low                                              | Low                                     | Low                                                | Moderate                 | Low                             | Low                                      | Serious      |
| Abu-Raddad et al. <sup>8</sup>       | Moderate                | Low                                              | Low                                     | Low                                                | Low                      | Low                             | Low                                      | Moderate     |
| Lopez Bernal et al. <sup>61</sup>    | Moderate                | Low                                              | Low                                     | Low                                                | Low                      | Low                             | Low                                      | Moderate     |
| Vasileiou et al. <sup>49</sup>       | Moderate                | Low                                              | Low                                     | Low                                                | Low                      | Low                             | Low                                      | Moderate     |
| Glampson et al. <sup>31, 51</sup>    | Moderate                | Low                                              | Low                                     | Low                                                | Low                      | Low                             | Low                                      | Moderate     |
| Corchado-Garcia et al. <sup>26</sup> | Moderate                | Low                                              | Low                                     | Low                                                | Low                      | Low                             | Low                                      | Moderate     |
| Lopez Bernal et al. <sup>20</sup>    | Moderate                | Low                                              | Low                                     | Low                                                | Low                      | Low                             | Low                                      | Moderate     |
| Chung et al. <sup>25</sup>           | Moderate                | Low                                              | Low                                     | Low                                                | Low                      | Low                             | Low                                      | Moderate     |
| Skowronski et al. <sup>45, 52</sup>  | Moderate                | Low                                              | Low                                     | Low                                                | Moderate                 | Low                             | Low                                      | Moderate     |
| Jones et al. <sup>35</sup>           | Moderate                | Low                                              | Low                                     | Low                                                | Low                      | Low                             | Low                                      | Moderate     |
| Fabiani et al. <sup>29</sup>         | Moderate                | Low                                              | Low                                     | Low                                                | Low                      | Low                             | Low                                      | Moderate     |
| Hall et al. <sup>33</sup>            | Moderate                | Low                                              | Low                                     | Low                                                | Low                      | Low                             | Low                                      | Moderate     |
| Pilishvii et al. <sup>40</sup>       | Moderate                | Low                                              | Low                                     | Low                                                | Low                      | Low                             | Low                                      | Moderate     |

|                                     |          |          |     |     |          |     |     |          |
|-------------------------------------|----------|----------|-----|-----|----------|-----|-----|----------|
| Swift et al. <sup>46</sup>          | Moderate | Low      | Low | Low | Low      | Low | Low | Moderate |
| Bianchi et al. <sup>21</sup>        | Moderate | Low      | Low | Low | Low      | Low | Low | Moderate |
| Daniel et al. <sup>28</sup>         | Serious  | Serious  | Low | Low | Low      | Low | Low | Serious  |
| Benenson et al. <sup>18</sup>       | Critical | Critical | Low | Low | Low      | Low | Low | Critical |
| Amit et al. <sup>14</sup>           | Moderate | Low      | Low | Low | Low      | Low | Low | Moderate |
| Lumley et al. <sup>37, 60</sup>     | Moderate | Low      | Low | Low | Low      | Low | Low | Moderate |
| Angel et al. <sup>15</sup>          | Moderate | Low      | Low | Low | Low      | Low | Low | Moderate |
| Moustsen-Helms et al. <sup>38</sup> | Moderate | Low      | Low | Low | Low      | Low | Low | Moderate |
| Shrotri et al. <sup>50</sup>        | Moderate | Low      | Low | Low | Low      | Low | Low | Moderate |
| Emborg et al. <sup>10</sup>         | Moderate | Low      | Low | Low | Low      | Low | Low | Moderate |
| Ranzani et al. <sup>42</sup>        | Moderate | Low      | Low | Low | Low      | Low | Low | Moderate |
| Mazagatos et al. <sup>11</sup>      | Moderate | Low      | Low | Low | Low      | Low | Low | Moderate |
| Azamgarhi et al. <sup>16</sup>      | Moderate | Low      | Low | Low | Low      | Low | Low | Moderate |
| Thompson et al. <sup>47</sup>       | Moderate | Low      | Low | Low | Moderate | Low | Low | Moderate |
| Lopez Bernal et al. <sup>19</sup>   | Moderate | Low      | Low | Low | Low      | Low | Low | Moderate |
| Hitchings et al. <sup>34</sup>      | Moderate | Low      | Low | Low | Low      | Low | Low | Moderate |
| Shrestha et al. <sup>43</sup>       | Moderate | Low      | Low | Low | Low      | Low | Low | Moderate |
| Vahidy et al. <sup>48</sup>         | Moderate | Low      | Low | Low | Low      | Low | Low | Moderate |
| Baum et al. <sup>17</sup>           | Moderate | Low      | Low | Low | Low      | Low | Low | Moderate |
| Chodick et al. <sup>23</sup>        | Moderate | Low      | Low | Low | Low      | Low | Low | Moderate |
| Chodick et al. <sup>24</sup>        | Moderate | Low      | Low | Low | Low      | Low | Low | Moderate |
| Flacco et al. <sup>30</sup>         | Moderate | Low      | Low | Low | Low      | Low | Low | Moderate |

Table S3. Summary of the studies on the effectiveness of COVID-19 vaccines across age groups

| Study first author / Country       | Study design | No. of vaccinated / No. of unvaccinated | Participants | Age   | Vaccine  | Outcome                | Days after the 1st dose | VE of 1st dose (95% CI) | Days after the 2nd dose | VE of 2nd dose (95% CI) | Variants involved |
|------------------------------------|--------------|-----------------------------------------|--------------|-------|----------|------------------------|-------------------------|-------------------------|-------------------------|-------------------------|-------------------|
| Dagan et al./ Israel <sup>27</sup> | Cohort study | 596618/ 596618                          | GP           | ≥16   | BNT162b2 | Overall infection      | 14–20                   | 46%<br>(40%–51%)        | ≥7                      | 92%<br>(88%–95%)        | B.1.1.7           |
|                                    |              | 213090/ 213090                          | GP           | 16–39 | BNT162b2 | Overall infection      | 14–20                   | 49%<br>(41%–57%)        | ≥7                      | 94%<br>(87%–93%)        | B.1.1.7           |
|                                    |              | 304514/ 304514                          | GP           | 40–69 | BNT162b2 | Overall infection      | 14–20                   | 47%<br>(40%–55%)        | ≥7                      | 90%<br>(82%–95%)        | B.1.1.7           |
|                                    |              | 79014/ 79014                            | GP           | ≥70   | BNT162b2 | Overall infection      | 14–20                   | 22%<br>(-9%–44%)        | ≥7                      | 95%<br>(87%–100%)       | B.1.1.7           |
|                                    |              | 596618/ 596618                          | GP           | ≥16   | BNT162b2 | Symptomatic infection  | 14–20                   | 57%<br>(50%–63%)        | ≥7                      | 94%<br>(87%–98%)        | B.1.1.7           |
|                                    |              | 213090/ 213090                          | GP           | 16–39 | BNT162b2 | Symptomatic infection  | 14–20                   | 57%<br>(46%–68%)        | ≥7                      | 99%<br>(96%–100%)       | B.1.1.7           |
|                                    |              | 304514/ 304514                          | GP           | 40–69 | BNT162b2 | Symptomatic infection  | 14–20                   | 59%<br>(50%–67%)        | ≥7                      | 90%<br>(75%–98%)        | B.1.1.7           |
|                                    |              | 79014/ 79014                            | GP           | ≥70   | BNT162b2 | Symptomatic infection  | 14–20                   | 44%<br>(19%–64%)        | ≥7                      | 98%<br>(90%–100%)       | B.1.1.7           |
| Haas et al./ Israel <sup>32</sup>  | Cohort study | 4714932/ 1823979 <sup>a</sup>           | GP           | ≥16   | BNT162b2 | Overall infection      | N/A                     | N/A                     | ≥7                      | 95.3%<br>(94.9%–95.7%)  | B.1.1.7           |
|                                    |              | 2290820/ 1356028 <sup>a</sup>           | GP           | 16–44 | BNT162b2 | Overall infection      | N/A                     | N/A                     | ≥7                      | 96.1%<br>(95.7%–96.5%)  | B.1.1.7           |
|                                    |              | 1408492/ 355606 <sup>a</sup>            | GP           | 45–64 | BNT162b2 | Overall infection      | N/A                     | N/A                     | ≥7                      | 94.9%<br>(94.2%–95.5%)  | B.1.1.7           |
|                                    |              | 1015620/ 112345 <sup>a</sup>            | GP           | ≥65   | BNT162b2 | Overall infection      | N/A                     | N/A                     | ≥7                      | 94.8%<br>(93.9%–95.5%)  | B.1.1.7           |
|                                    |              | 4714932/ 1823979 <sup>a</sup>           | GP           | ≥16   | BNT162b2 | Asymptomatic infection | N/A                     | N/A                     | ≥7                      | 91.5%<br>(90.7%–92.2%)  | B.1.1.7           |
|                                    |              | 2290820/ 1356028 <sup>a</sup>           | GP           | 16–44 | BNT162b2 | Asymptomatic infection | N/A                     | N/A                     | ≥7                      | 93.6%<br>(92.8%–94.4%)  | B.1.1.7           |

|                                  |    |       |          |                           |     |     |    |                        |         |
|----------------------------------|----|-------|----------|---------------------------|-----|-----|----|------------------------|---------|
| 1408492/<br>355606 <sup>a</sup>  | GP | 45–64 | BNT162b2 | Asymptomatic<br>infection | N/A | N/A | ≥7 | 90.8%<br>(89.6%–91.9%) | B.1.1.7 |
| 1015620/<br>112345 <sup>a</sup>  | GP | ≥65   | BNT162b2 | Asymptomatic<br>infection | N/A | N/A | ≥7 | 88.5%<br>(86.4%–90.3%) | B.1.1.7 |
| 4714932/<br>1823979 <sup>a</sup> | GP | ≥16   | BNT162b2 | Symptomatic infection     | N/A | N/A | ≥7 | 97.0%<br>(96.7%–97.2%) | B.1.1.7 |
| 2290820/<br>1356028 <sup>a</sup> | GP | 16–44 | BNT162b2 | Symptomatic infection     | N/A | N/A | ≥7 | 97.6%<br>(97.3%–97.8%) | B.1.1.7 |
| 1408492/<br>355606 <sup>a</sup>  | GP | 45–64 | BNT162b2 | Symptomatic infection     | N/A | N/A | ≥7 | 96.7%<br>(96.3%–97.0%) | B.1.1.7 |
| 1015620/<br>112345 <sup>a</sup>  | GP | ≥65   | BNT162b2 | Symptomatic infection     | N/A | N/A | ≥7 | 96.4%<br>(95.9%–97.0%) | B.1.1.7 |
| 4714932/<br>1823979 <sup>a</sup> | GP | ≥16   | BNT162b2 | Hospitalization           | N/A | N/A | ≥7 | 97.2%<br>(96.8%–97.5%) | B.1.1.7 |
| 2290820/<br>1356028 <sup>a</sup> | GP | 16–44 | BNT162b2 | Hospitalization           | N/A | N/A | ≥7 | 98.1%<br>(97.3%–98.7%) | B.1.1.7 |
| 1408492/<br>355606 <sup>a</sup>  | GP | 45–64 | BNT162b2 | Hospitalization           | N/A | N/A | ≥7 | 97.6%<br>(97.1%–98.1%) | B.1.1.7 |
| 1015620/<br>112345 <sup>a</sup>  | GP | ≥65   | BNT162b2 | Hospitalization           | N/A | N/A | ≥7 | 96.8%<br>(96.2%–97.3%) | B.1.1.7 |
| 4714932/<br>1823979 <sup>a</sup> | GP | ≥16   | BNT162b2 | Critical disease          | N/A | N/A | ≥7 | 97.5%<br>(97.1%–97.8%) | B.1.1.7 |
| 2290820/<br>1356028 <sup>a</sup> | GP | 16–44 | BNT162b2 | Critical disease          | N/A | N/A | ≥7 | 98.9%<br>(97.6%–99.5%) | B.1.1.7 |
| 1408492/<br>355606 <sup>a</sup>  | GP | 45–64 | BNT162b2 | Critical disease          | N/A | N/A | ≥7 | 98.1%<br>(97.5%–98.5%) | B.1.1.7 |
| 1015620/<br>112345 <sup>a</sup>  | GP | ≥65   | BNT162b2 | Critical disease          | N/A | N/A | ≥7 | 97.3%<br>(96.8%–97.8%) | B.1.1.7 |
| 4714932/<br>1823979 <sup>a</sup> | GP | ≥16   | BNT162b2 | Death                     | N/A | N/A | ≥7 | 96.7%<br>(96.0%–97.3%) | B.1.1.7 |
| 2290820/<br>1356028 <sup>a</sup> | GP | 16–44 | BNT162b2 | Death                     | N/A | N/A | ≥7 | 100%                   | B.1.1.7 |
| 1408492/<br>355606 <sup>a</sup>  | GP | 45–64 | BNT162b2 | Death                     | N/A | N/A | ≥7 | 95.8%<br>(92.6%–97.6%) | B.1.1.7 |
| 1015620/<br>112345 <sup>a</sup>  | GP | ≥65   | BNT162b2 | Death                     | N/A | N/A | ≥7 | 96.9%<br>(96.0%–97.6%) | B.1.1.7 |

|                                    |                    |                  |    |       |                   |                   |       |                   |     |                  |         |
|------------------------------------|--------------------|------------------|----|-------|-------------------|-------------------|-------|-------------------|-----|------------------|---------|
| Pritchard et al./ UK <sup>41</sup> | Case-control study | 67738/ 192224    | GP | ≥16   | BNT162b2          | Overall infection | ≥ 21  | 66%<br>(60%–71%)  | ≥1  | 80%<br>(73%–85%) | B.1.1.7 |
|                                    |                    | 123850/ 192224   | GP | ≥16   | ChAdOx1           | Overall infection | ≥ 21  | 61%<br>(54%–68%)  | ≥1  | 79%<br>(65%–88%) | B.1.1.7 |
|                                    |                    |                  | GP | <75   | BNT162b2, ChAdOx1 | Overall infection | ≥ 21  | 60%<br>(54%–65%)  | N/A | N/A              | B.1.1.7 |
|                                    |                    |                  | GP | ≥75   | BNT162b2, ChAdOx1 | Overall infection | ≥ 21  | 72%<br>(64%–78%)  | N/A | N/A              | B.1.1.7 |
| Vasileiou et al./ UK <sup>49</sup> | Cohort study       | 1331993/ 3077595 | GP | ≥18   | BNT162b2, ChAdOx1 | Hospitalization   | 28–34 | 89%<br>(83%–92%)  | N/A | N/A              |         |
|                                    |                    | 711839/ 3077595  | GP | ≥18   | BNT162b2          | Hospitalization   | 28–34 | 91%<br>(85%–94%)  | N/A | N/A              |         |
|                                    |                    | 620154/ 3077595  | GP | ≥18   | ChAdOx1           | Hospitalization   | 28–34 | 88%<br>(75%–94%)  | N/A | N/A              |         |
|                                    |                    | 470960/ 2913484  | GP | 18–64 | BNT162b2, ChAdOx1 | Hospitalization   | 28–34 | 92%<br>(82%–97%)  | N/A | N/A              |         |
|                                    |                    | 651924/ 107022   | GP | 65–79 | BNT162b2, ChAdOx1 | Hospitalization   | 28–34 | 93%<br>(73%–98%)  | N/A | N/A              |         |
|                                    |                    | 209109/ 57089    | GP | ≥80   | BNT162b2, ChAdOx1 | Hospitalization   | 28–34 | 83%<br>(72%–89%)  | N/A | N/A              |         |
|                                    |                    | 359434/ 2913484  | GP | 18–64 | BNT162b2          | Hospitalization   | 28–34 | 92%<br>(82%–97%)  | N/A | N/A              |         |
|                                    |                    | 315620/ 107022   | GP | 65–79 | BNT162b2          | Hospitalization   | 28–34 | 93%<br>(73%–98%)  | N/A | N/A              |         |
|                                    |                    | 36785/ 57089     | GP | ≥80   | BNT162b2          | Hospitalization   | 28–34 | 88%<br>(76%–94%)  | N/A | N/A              |         |
|                                    |                    | 111526/ 2913484  | GP | 18–64 | ChAdOx1           | Hospitalization   | 28–34 | 100%<br>(NA–100%) | N/A | N/A              |         |
|                                    |                    | 336304/ 107022   | GP | 65–79 | ChAdOx1           | Hospitalization   | 28–34 | 100%<br>(NA–100%) | N/A | N/A              |         |
|                                    |                    | 172324/ 57089    | GP | ≥80   | ChAdOx1           | Hospitalization   | 28–34 | 81%<br>(60%–91%)  | N/A | N/A              |         |

|                                        |                    |                                                         |    |       |           |                   |       |                        |      |                        |     |
|----------------------------------------|--------------------|---------------------------------------------------------|----|-------|-----------|-------------------|-------|------------------------|------|------------------------|-----|
| Ranzani et al./ Brazil <sup>42 b</sup> | Case-control study | 4854/ 11046                                             | GP | ≥70   | CoronaVac | Overall infection | N/A   | N/A                    | ≥14  | 41.6%<br>(26.9%–53.3%) | P.1 |
|                                        |                    |                                                         | GP | 70–74 | CoronaVac | Overall infection | N/A   | N/A                    | ≥14  | 61.8%<br>(34.8%–77.7%) | P.1 |
|                                        |                    |                                                         | GP | 75–79 | CoronaVac | Overall infection | N/A   | N/A                    | ≥14  | 48.9%<br>(23.3%–66.0%) | P.1 |
|                                        |                    |                                                         | GP | ≥80   | CoronaVac | Overall infection | N/A   | N/A                    | ≥14  | 28.0%<br>(0.6%–47.9%)  | P.1 |
| Chodick et al./ Israel <sup>23</sup>   | Cohort study       | 503875<br>(351897 had follow-up data for days 13 to 24) | GP | ≥16   | BNT162b2  | Overall infection | 13–24 | 51.4%<br>(16.3%–71.8%) | N/A  | N/A                    |     |
|                                        |                    |                                                         | GP | <60   | BNT162b2  | Overall infection | 13–24 | 50.2%<br>(14.1%–71.2%) | N/A  | N/A                    |     |
|                                        |                    |                                                         | GP | ≥60   | BNT162b2  | Overall infection | 13–24 | 44.5%<br>(4.2%–67.9%)  | N/A  | N/A                    |     |
| Chodick et al./ Israel <sup>24</sup>   | Cohort study       | 1178597<br>(872454 reach protection period)             | GP | ≥16   | BNT162b2  | Overall infection | N/A   | N/A                    | 7–27 | 90%<br>(79%–95%)       |     |
|                                        |                    |                                                         | GP | 16–44 | BNT162b2  | Overall infection | N/A   | N/A                    | 7–27 | 92%<br>(83%–96%)       |     |
|                                        |                    |                                                         | GP | 45–64 | BNT162b2  | Overall infection | N/A   | N/A                    | 7–27 | 90%<br>(80%–95%)       |     |
|                                        |                    |                                                         | GP | 65–74 | BNT162b2  | Overall infection | N/A   | N/A                    | 7–27 | 82%<br>(63%–92%)       |     |
|                                        |                    |                                                         | GP | ≥75   | BNT162b2  | Overall infection | N/A   | N/A                    | 7–27 | 82%<br>(61%–91%)       |     |

GP: general population, N/A: not available



<sup>a</sup> No. of fully vaccinated / No. of not fully vaccinated

<sup>b</sup> Preprint
